# Supplementary material for: The association between osteoporosis medications and lowered all-cause mortality after hip or vertebral fracture in older and oldest-old adults: a nationwide population-based study
Source: publisher site journal article supplement (doi:10.18632/aging.203927), 2022-03-01
Supplement: Supplementary file [file aging-v14i5-203927-supplementary-material-SD1.pdf]

**SUPPLEMENTARY FIGURES**

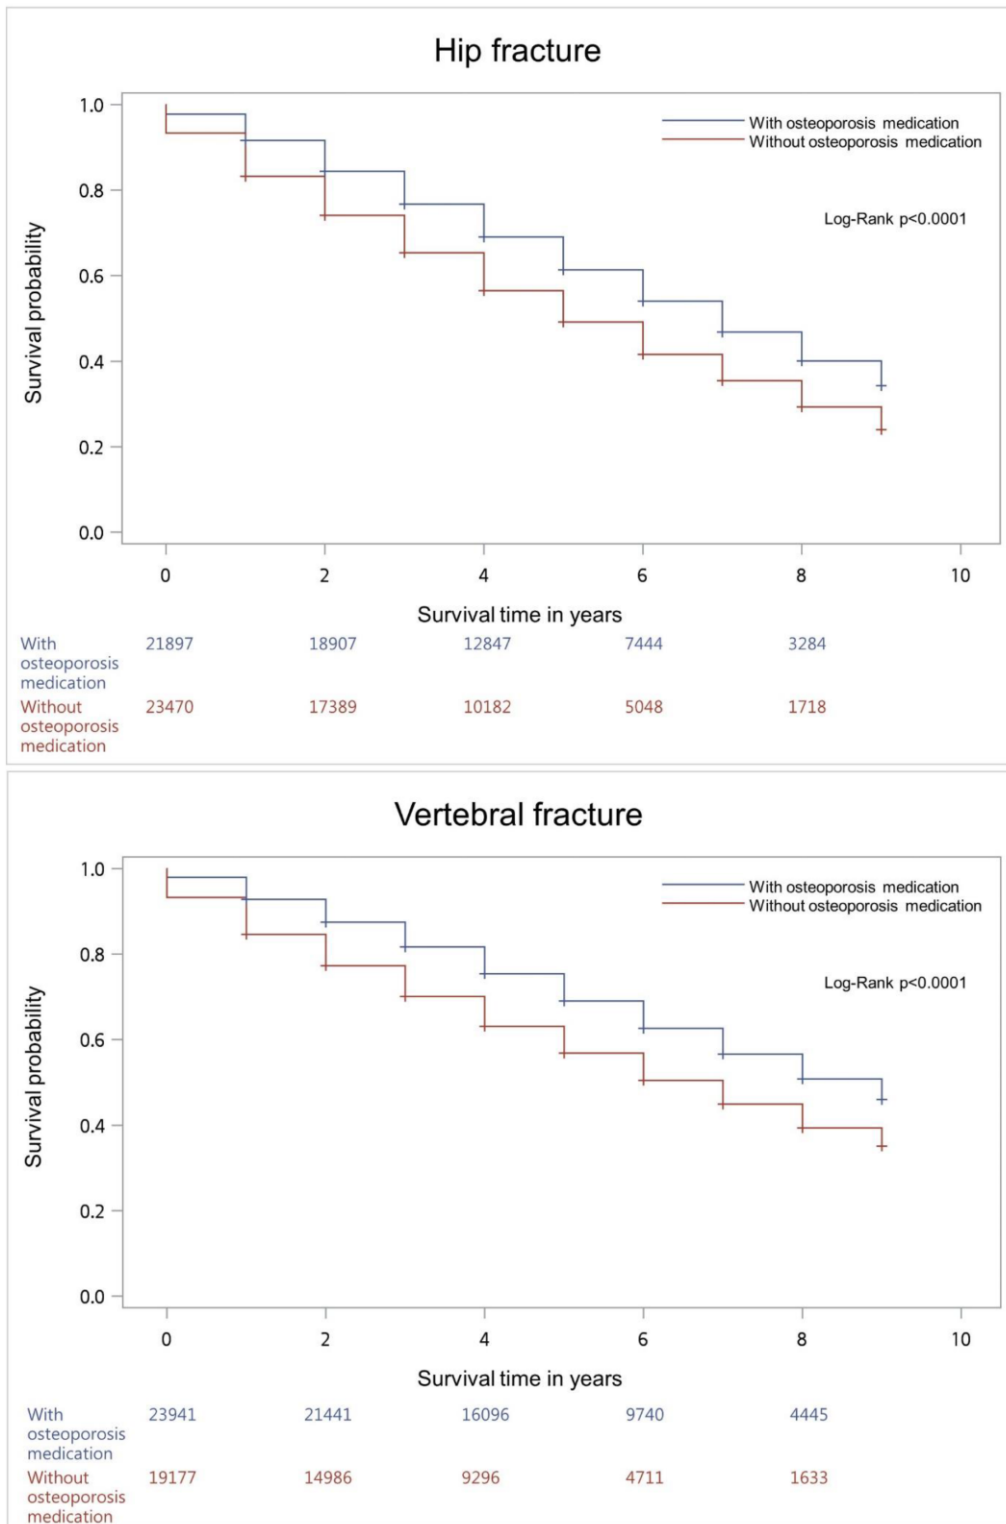

**Supplementary Figure 1. Kaplan-Meier survival curve for adults aged 65 years old and older.**

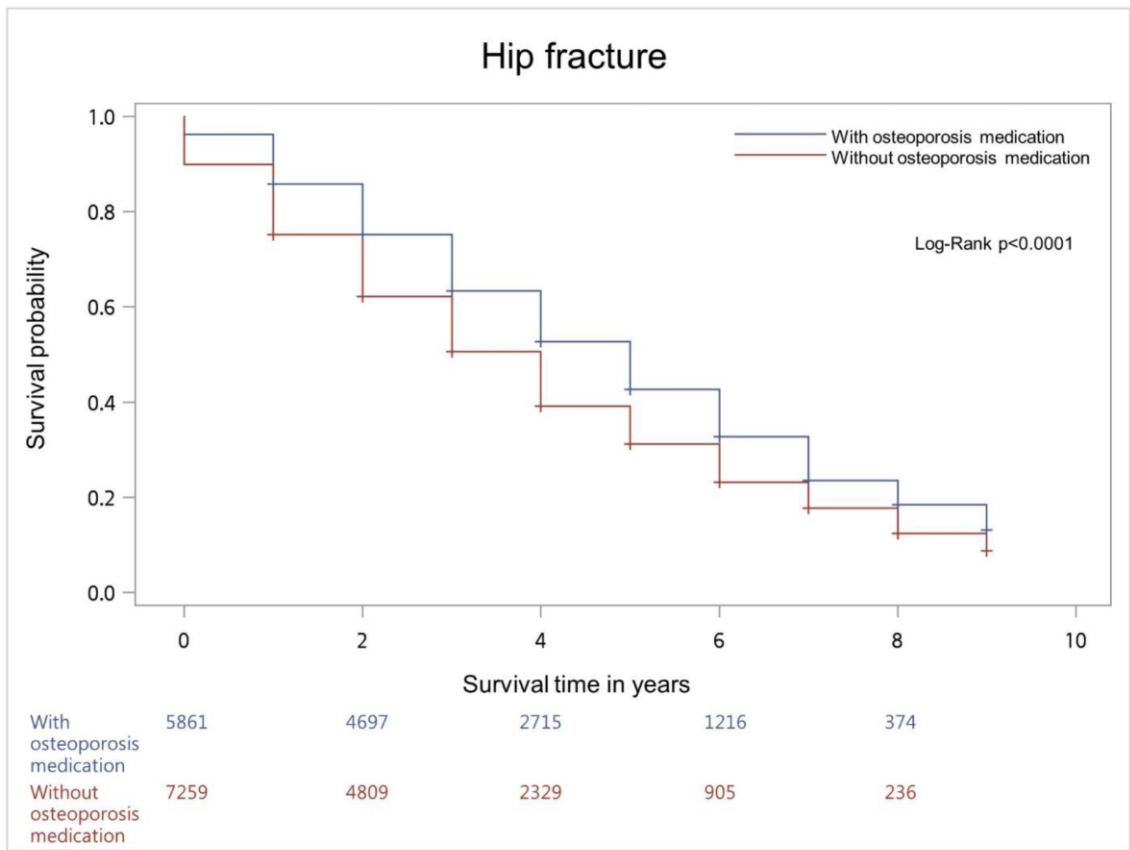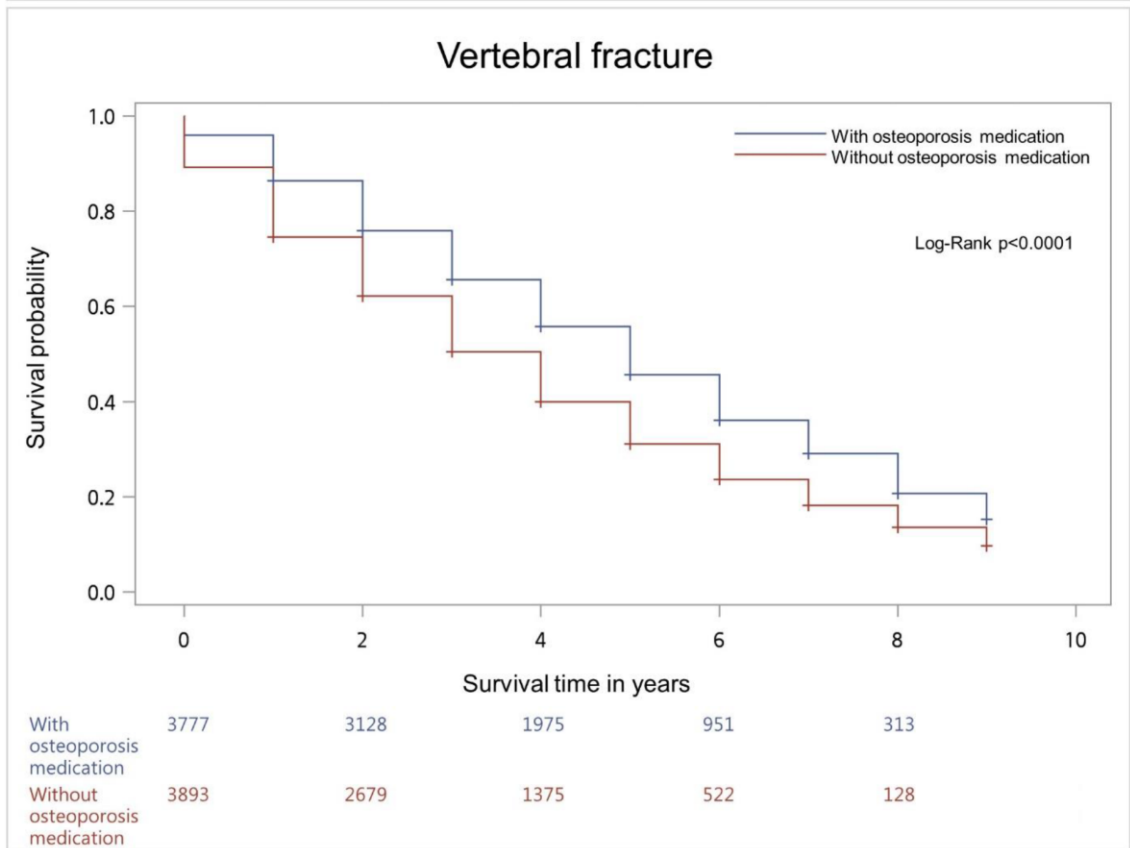

Supplementary Figure 2. Kaplan-Meier survival curve for adults aged 85 years old and older.
