# Supplementary material for: The association between osteoporosis medications and lowered all-cause mortality after hip or vertebral fracture in older and oldest-old adults: a nationwide population-based study
Source: Aging (Albany NY). 2022 Mar 1;14(5):2239–51. doi: 10.18632/aging.203927 (PMC8954959; doi:10.18632/aging.203927)
Supplement: Supplementary Tables [file aging-14-203927-s002.pdf]

## SUPPLEMENTARY TABLES

**Supplementary Table 1. Associations between hip or vertebral fracture and mortality in adults 65 years of age and older by multivariate Cox proportional regression adjusted for immortal time bias.**

|                                        | Hip fracture<br>N=45,367 | Vertebral fracture<br>N=43,118 |
|----------------------------------------|--------------------------|--------------------------------|
|                                        | HR (95% CI)              | HR (95% CI)                    |
| Gender (ref. Male)                     | 1.00                     | 1.00                           |
| Female                                 | 0.70(0.68-0.72) ***      | 0.66(0.64-0.68) ***            |
| Age                                    | 1.08(1.08-1.09) ***      | 1.09(1.08-1.09) ***            |
| Charlson Comorbidity Index (CCI) score | 1.12(1.11-1.12) ***      | 1.13(1.12-1.14) ***            |
| Osteoporosis medication                |                          |                                |
| Without medication                     | 1.00                     | 1.00                           |
| With medication                        | 0.89(0.87-0.92) ***      | 0.87(0.84-0.90) ***            |

Abbreviations: HR, hazard ratio; CI, confidence interval. \*\*\* $p < 0.001$ .

**Supplementary Table 2. Cox proportional hazard analyses adjusted by IPTW with PS of the association between hip or vertebral fracture and mortality of adults aged 65 years old and older.**

|                                        | Hip fracture<br>N=45,367          | Vertebral fracture<br>N=43,118    |
|----------------------------------------|-----------------------------------|-----------------------------------|
|                                        | Adjusted HR (95% CI) <sup>a</sup> | Adjusted HR (95% CI) <sup>a</sup> |
| Gender (ref. Male)                     | 1.00                              | 1.00                              |
| Female                                 | 0.70(0.68-0.72) ***               | 0.66(0.64-0.68) ***               |
| Age                                    | 1.08(1.08-1.09) ***               | 1.09(1.08-1.09) ***               |
| Charlson Comorbidity Index (CCI) score | 1.12(1.11-1.12) ***               | 1.13(1.12-1.14) ***               |
| Osteoporosis medication                |                                   |                                   |
| Without medication                     | 1.00                              | 1.00                              |
| With medication                        | 0.75(0.73-0.77) ***               | 0.74(0.72-0.76) ***               |

Abbreviations: HR, hazard ratio; CI, confidence interval. \*\*\* $p < 0.001$ .

<sup>a</sup>Adjusted hazard ratio (95% confidence interval) was calculated by using multivariable Cox proportional regression and adjusted by inverse probability of treatment weighting (IPTW) with propensity score (PS). Propensity scores were calculated by generating a logistic regression model that included all baseline characteristics to predict the probability of each patient survival status.
